# Supplementary material for: Force-controlled robotic mechanochemical synthesis
Source: Royal Society of Chemistry journal article supplement (doi:10.1039/d4dd00189c), 2024-01-01
Supplement: d4dd00189c1.pdf [file d4dd00189c1.pdf]

## Supplementary Information

### Force-Controlled Robotic Mechanochemical Synthesis

Yusaku Nakajima<sup>1</sup>, Kai Kawasaki<sup>1</sup>, Yasuo Takeichi<sup>1</sup>, Masashi Hamaya<sup>2</sup>, Yoshitaka Ushiku<sup>2</sup>, and Kanta Ono<sup>1</sup>

<sup>1</sup> Department of Applied Physics, Osaka University, Osaka, Japan.

<sup>2</sup> OMRON SINIC X Corporation, Tokyo, Japan.

# 1 Experiments to estimate spring constant of the soft jig

Fig. 1 shows the graph of the spring constant obtained from experiments conducted with a force of 20 N. At 20 N, a linear relationship between force and displacement can be observed.

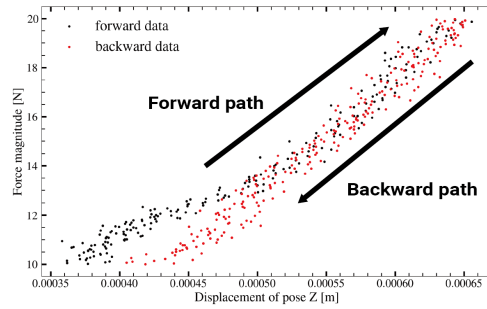

Fig. S 1: Graph illustrating the displacement of pose Z and the sensed force data. A linear relationship is observed between the displacement force magnitude.

## 2 Rietveld analysis results

The results of the Rietveld analysis for Experiment 2 and Experiment 3 are shown below.

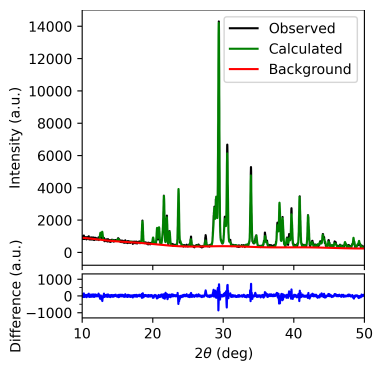

Fig. S 2: 20N 120rpm 30min

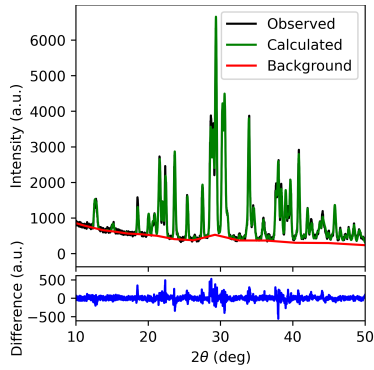

Fig. S 3: 20N 120rpm 60min

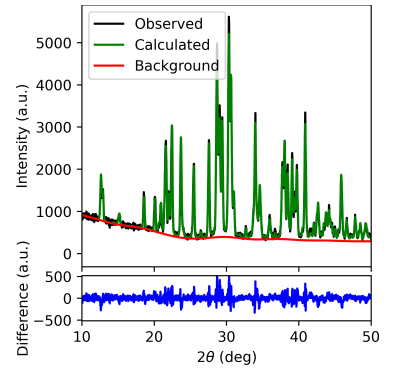

Fig. S 4: 20N 120rpm 90min

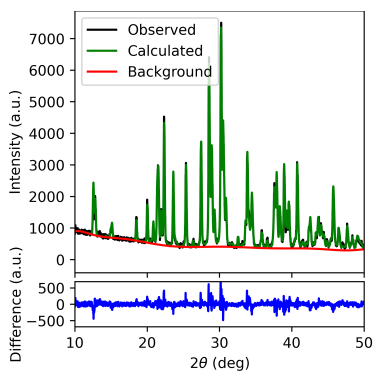

Fig. S 5: 20N 120rpm 120min

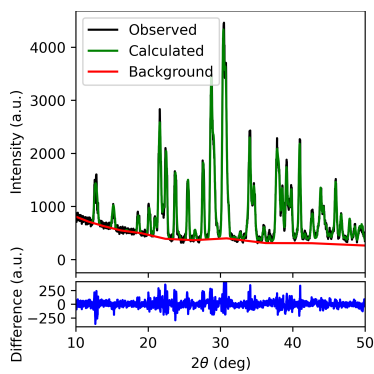

Fig. S 6: 20N 120rpm 150min

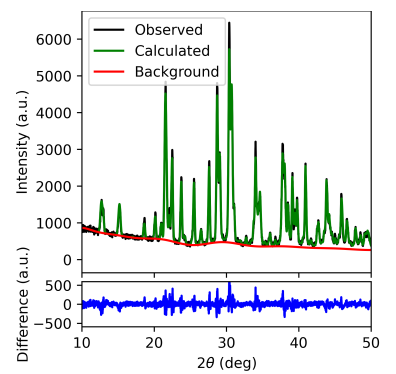

Fig. S 7: 20N 120rpm 180min

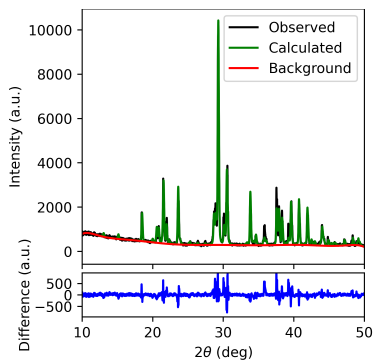

Fig. S 8: 10N 120rpm 30min

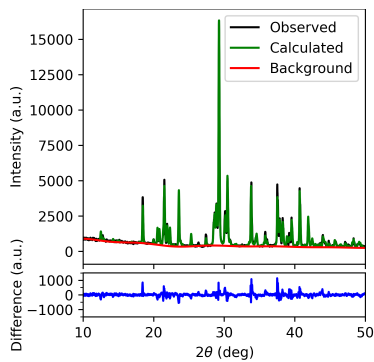

Fig. S 9: 10N 120rpm 60min

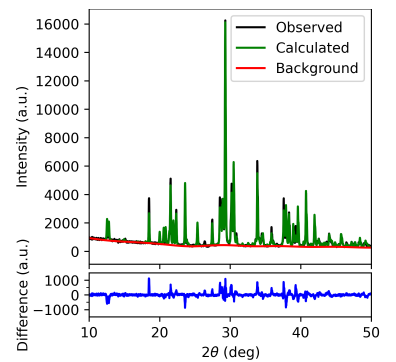

Fig. S 10: 10N 120rpm 90min

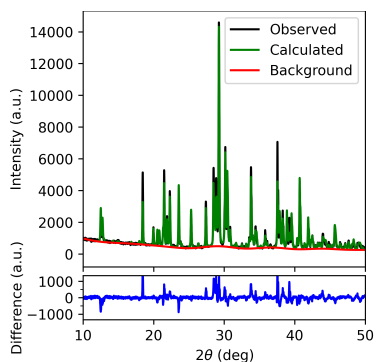

Fig. S 11: 10N 120rpm 120min

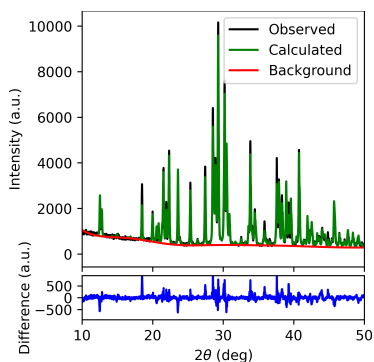

Fig. S 12: 10N 120rpm 150min

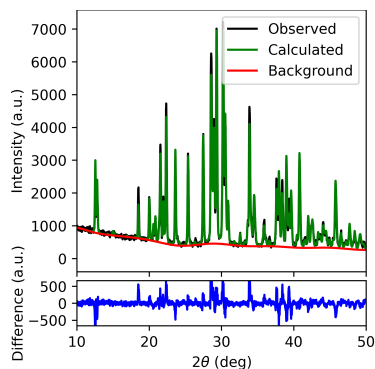

Fig. S 13: 10N 120rpm 180min

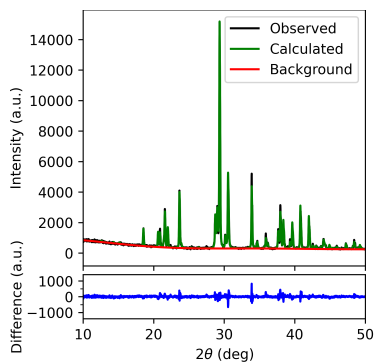

Fig. S 14: 10N 60rpm 30min

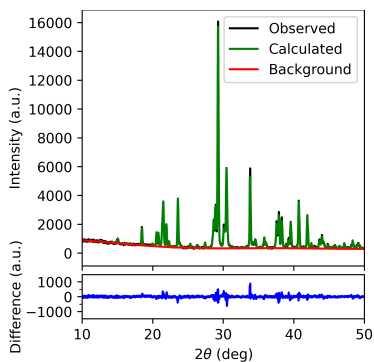

Fig. S 15: 10N 60rpm 60min

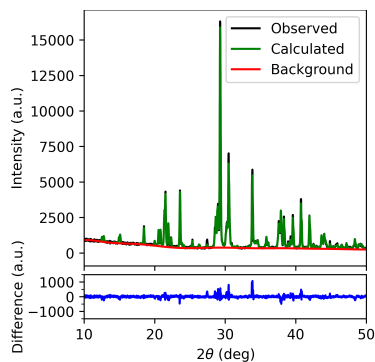

Fig. S 16: 10N 60rpm 90min

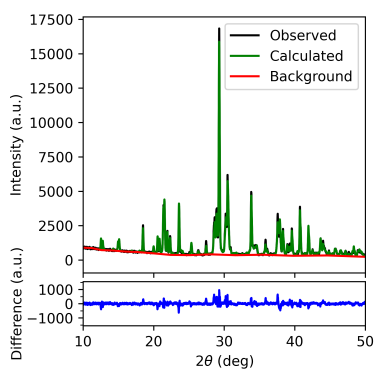

Fig. S 17: 10N 60rpm 120min

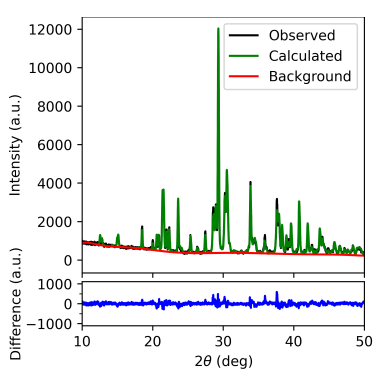

Fig. S 18: 10N 60rpm 150min

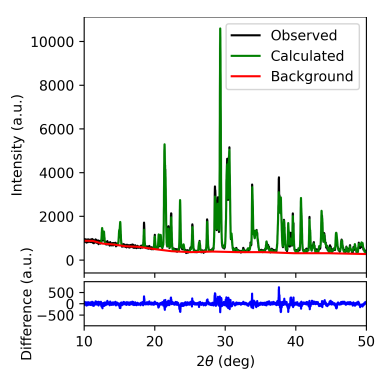

Fig. S 19: 10N 60rpm 180min
